# Supplementary material for: Pyrrolo [3,4-b]-quinolin-9-amine compound FZU-0038-056 suppresses triple-negative breast cancer partially through inhibiting the expression of Bcl-2
Source: publisher site journal article supplement (doi:10.18632/aging.103232), 2020-05-23
Supplement: Supplementary file [file aging-v12i10-103232-supplementary-material-SD1.pdf]

SUPPLEMENTARY FIGURES

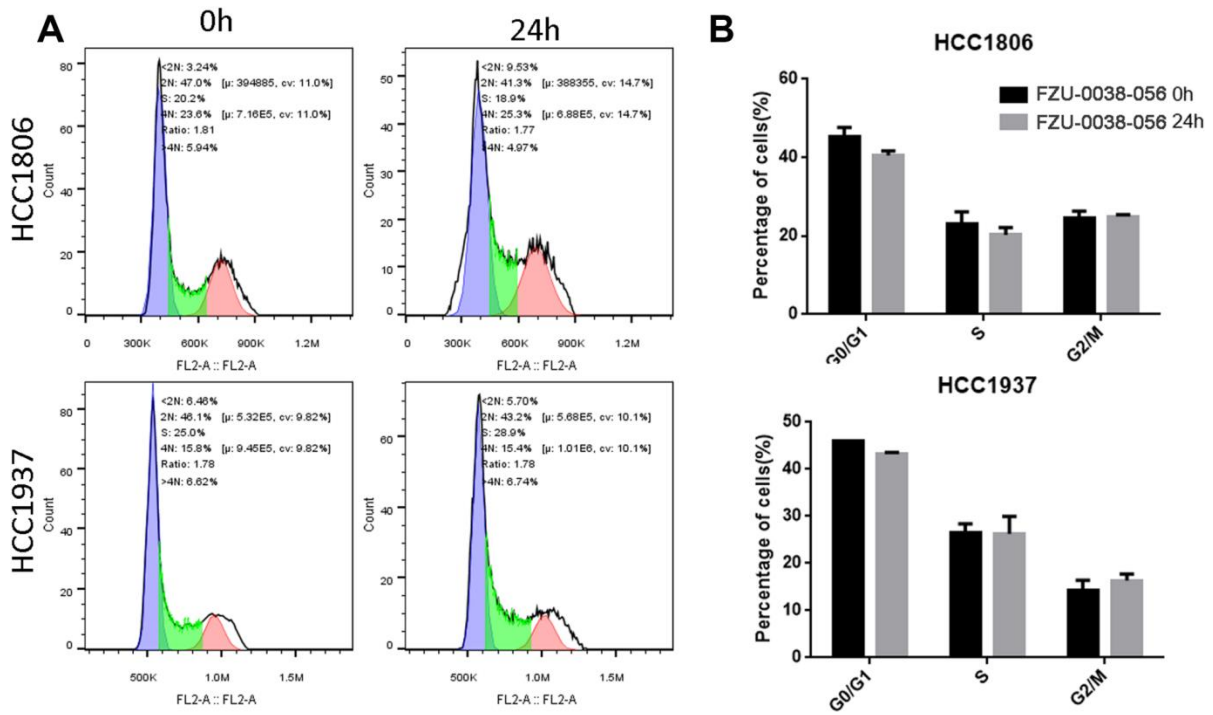

**Supplementary Figure 1. FZU-0038-056 does not affect TNBC cell cycle progression.** (A) The HCC1806 and HCC1937 breast cancer cells were treated with FZU-0038-056 (5  $\mu$ M) for 24 hours. DMSO was used as the negative control. Cells were collected for PI (Propidium iodide) staining and cell cycle analysis after treatment. (B) Quantification of panel A.

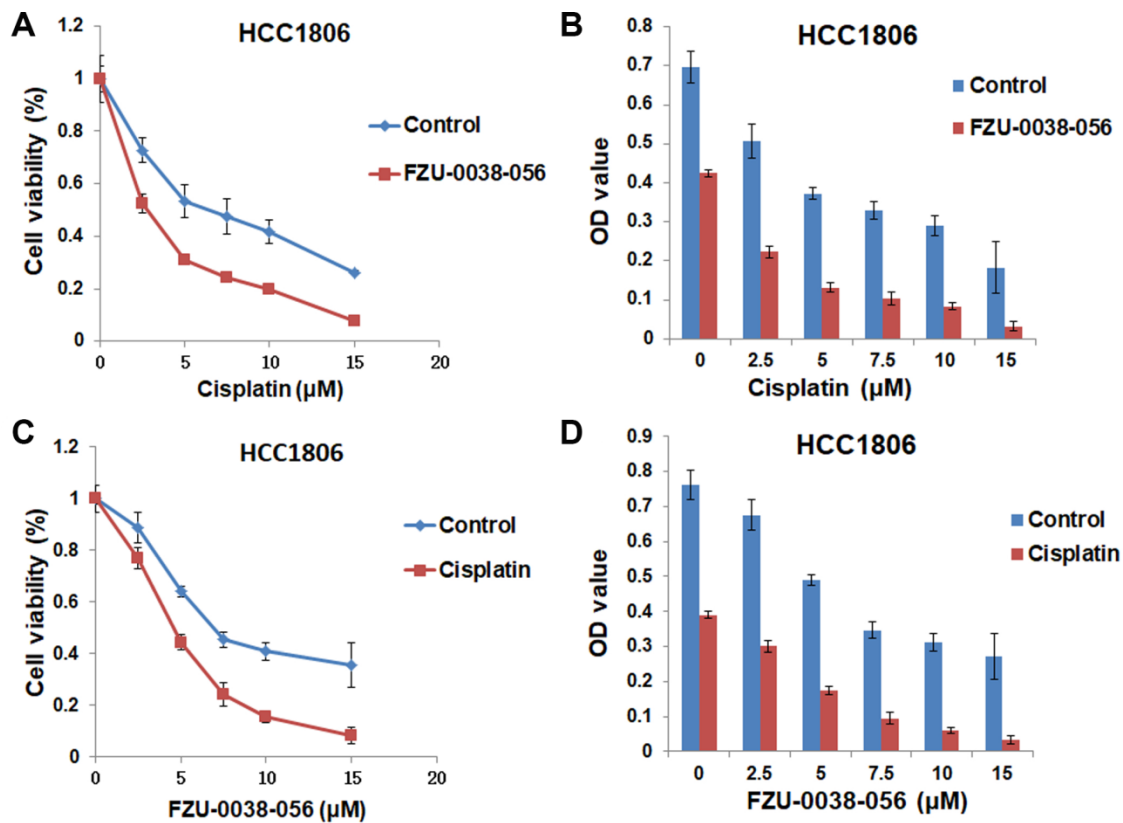

**Supplementary Figure 2. FZU-0038-056 and cisplatin synergistically suppress HCC1806 cell survival.** (A, B) HCC1806 cells were treated with FZU-0038-056 (5 $\mu\text{M}$ ) together with cisplatin at indicated dosages for 48 hours. Cells were fixed for SRB analysis after treatment. (C, D) HCC1806 cells were treated with cisplatin (5 $\mu\text{M}$ ) together with FZU-0038-056 at indicated dosages for 48 hours. Cells were fixed for SRB analysis after treatment.
